# Supplementary material for: A simple Ag–MoS2 hybrid nanozyme-based sensor array for colorimetric identification of biothiols and cancer cells
Source: Royal Society of Chemistry journal article supplement (doi:10.1039/d4ra05409a), 2024-01-01
Supplement: d4ra05409a1.pdf [file d4ra05409a1.pdf]

## Supporting information

# A Simple Ag-MoS<sub>2</sub> Hybrid Nanozyme-Based Sensor Array for Colorimetric Identification of Biothiols and Cancer Cells

Yin Li<sup>a</sup>, Yumeng Liu<sup>d</sup>, Yueqin Zhang<sup>d</sup>, Mengmeng Dong<sup>e</sup>, Lidong Cao<sup>b,c\*</sup>,  
Kai Jiang<sup>b\*</sup>

<sup>a</sup> Department of Dermatology, Children's Hospital, Zhejiang University School of Medicine, Hangzhou, China.

<sup>b</sup> Department of Hepatobiliary & Pancreatic Surgery and Minimally Invasive Surgery, Zhejiang Provincial People's Hospital, Affiliated People's Hospital, Hangzhou Medical College Hangzhou, China.

<sup>c</sup> College of Mechanical Engineering, Zhejiang University Hangzhou, China.

<sup>d</sup> School of Public Health, Hangzhou Medical College Hangzhou, China.

<sup>e</sup> Clinical Research Institute, Zhejiang Provincial People's Hospital (Affiliated People's Hospital), Hangzhou Medical College, Hangzhou, China.

\* Correspondence: [ilkwenxu2019@sina.com](mailto:ilkwenxu2019@sina.com) (Lidong Cao) and [jiangkai3212@126.com](mailto:jiangkai3212@126.com) (Kai Jiang)

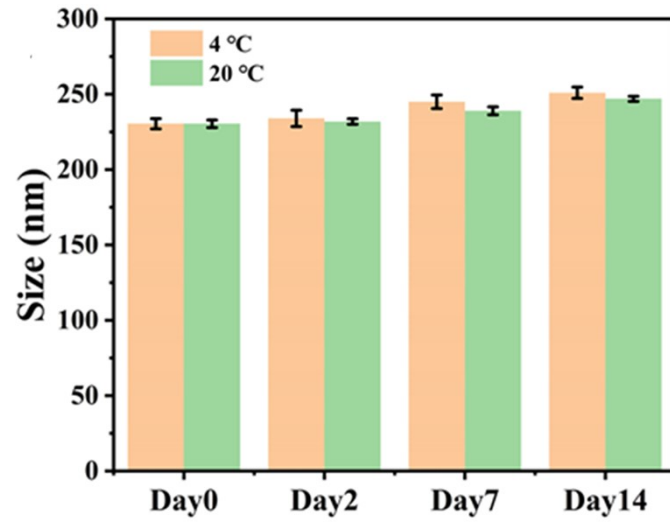

**Fig. S1** Sizes of material stored at 4 °C and 20 °C during 14 days, analyzed by DLS.

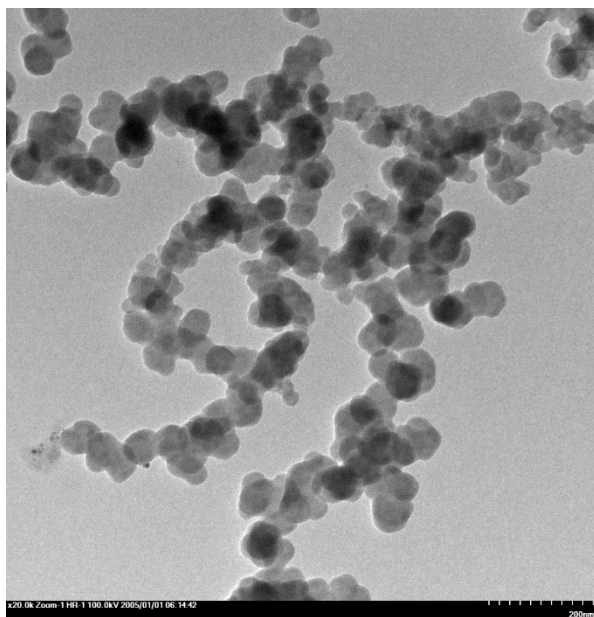

**Fig. S2** Typical TEM image of Ag NPs.

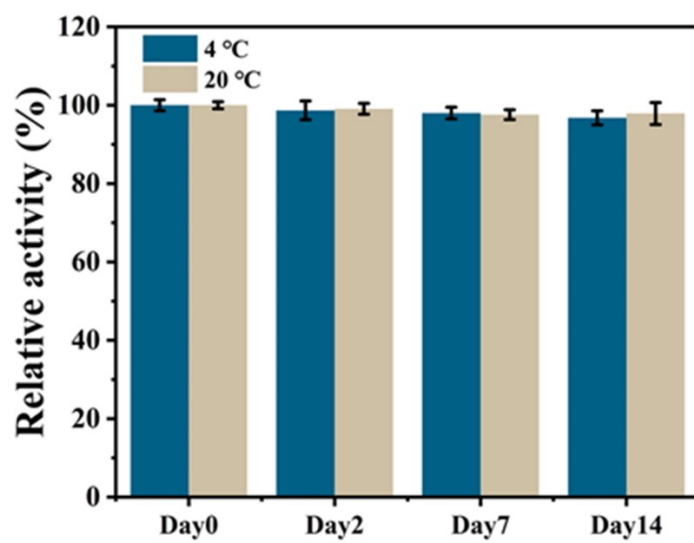

**Fig. S3.** Stability test of Ag-MoS<sub>2</sub> nanozyme. POD-like catalytic performance of material stored at 4 °C and 20 °C during 14 days.

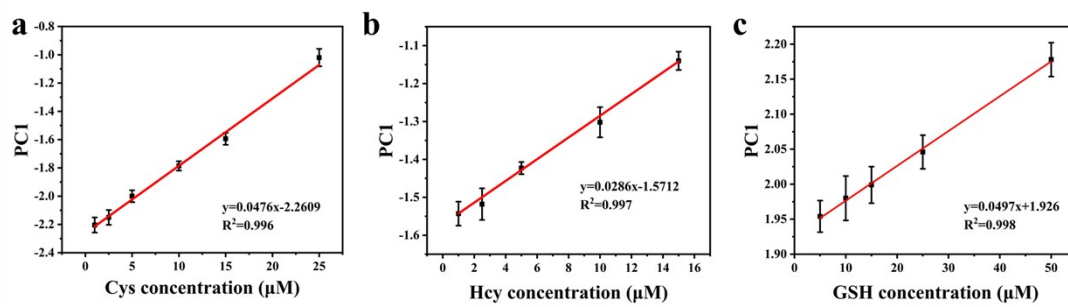

**Fig. S4.** Linear relationship between and PC factor and concentration of Cys (a), Hcy (b), and GSH (c), respectively.
